# Supplementary material for: Reduced Graphene Oxide/Waste-Derived TiO2 Composite Membranes: Preliminary Study of a New Material for Hybrid Wastewater Treatment
Source: MDPI journal article supplement (doi:10.3390/nano13061043), 2023-03-14
Supplement: s1 [file s1]

Supplementary Materials

# Reduced Graphene Oxide/Waste-Derived TiO<sub>2</sub> Composite Membranes: Preliminary Study of a New Material for Hybrid Wastewater Treatment

Andrea Basso Peressut <sup>1,\*</sup>, Cinzia Cristiani <sup>1</sup>, Giovanni Dotelli <sup>1,\*</sup>, Anna Dotti <sup>1</sup>, Saverio Latorrata <sup>1</sup>, Ana Bahamonde <sup>2</sup>, Antonio Gascó <sup>3</sup>, Daphne Hermosilla <sup>3</sup> and Riccardo Balzarotti <sup>4</sup>

- <sup>1</sup> Department of Chemistry, Materials and Chemical Engineering “Giulio Natta”, Politecnico di Milano, Piazza Leonardo Da Vinci 32, 20133 Milan, Italy
- <sup>2</sup> Instituto de Catálisis y Petroleoquímica, Consejo Superior de Investigaciones Científicas, Calle de Marie Curie 2, 28049 Madrid, Spain
- <sup>3</sup> Departamento de Ingeniería y Gestión Forestal y Ambiental, Universidad Politécnica de Madrid, Calle de José Antonio Novais 10, 28040 Madrid, Spain
- <sup>4</sup> Department of Innovative Technologies, University of Applied Sciences and Arts of Southern Switzerland, Via la Santa 1, 6962 Lugano, Switzerland
- \* Correspondence: andreastefano.basso@polimi.it (A.B.P.); giovanni.dotelli@polimi.it (G.D.)

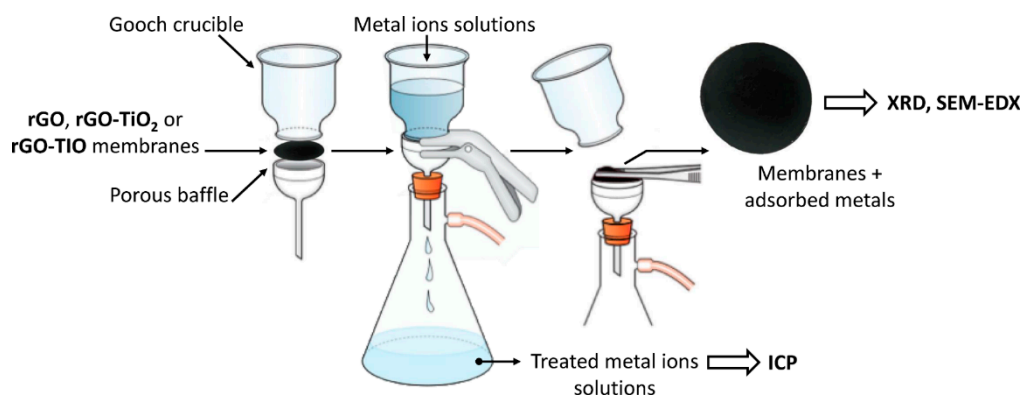

Figure S1. Metal adsorption procedure.

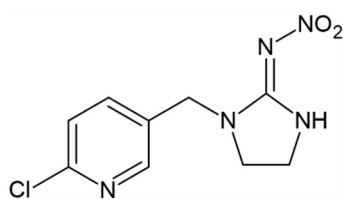

Figure S2. Structural formula of Imidacloprid®.

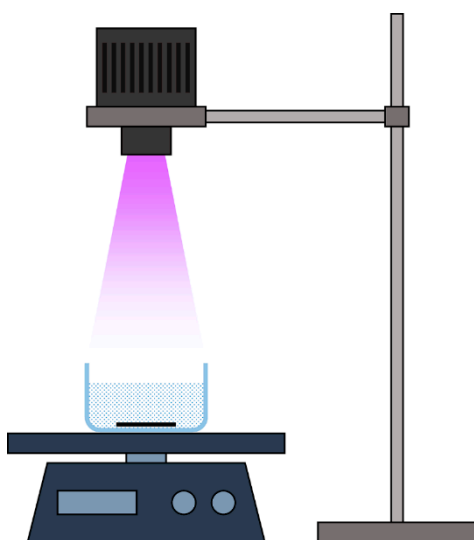

Figure S3. Experimental setup of photocatalysis tests.

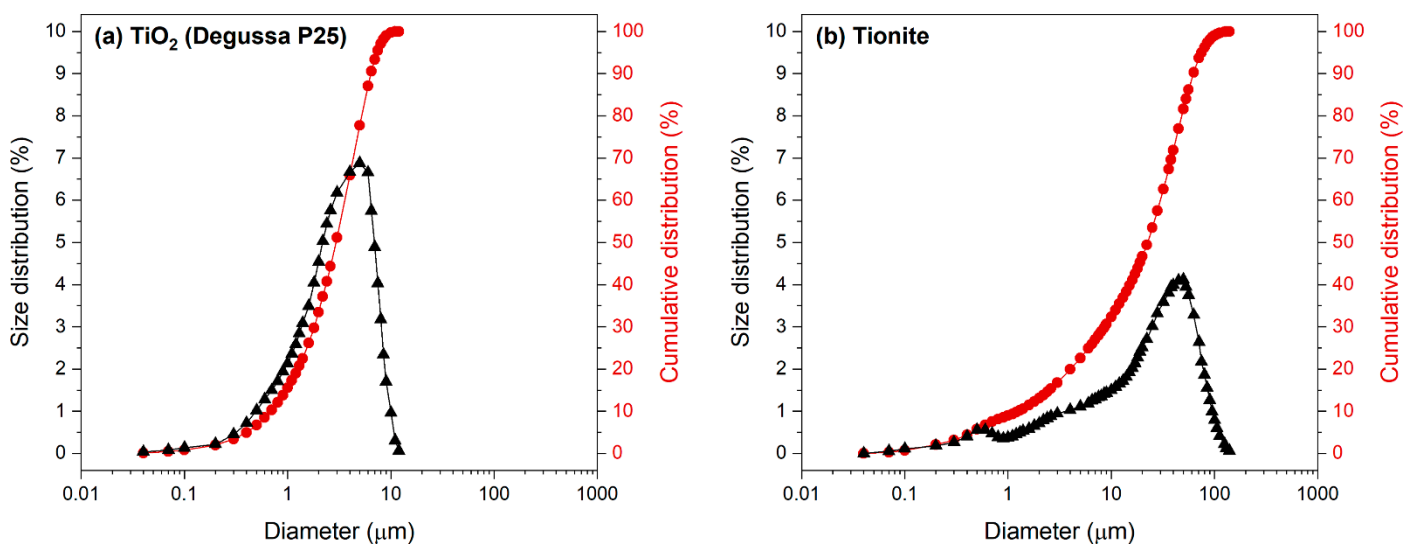

Figure S4. Particle size and cumulative distribution curves of (a) Degussa P25 TiO<sub>2</sub> and (b) Tionite.

**Table S1.** Chemical composition of Tionite, as supplied by Opigeo S.r.L.

| Element                              | Amount (%) | Element | Amount (mg kg <sup>-1</sup> ) |
|--------------------------------------|------------|---------|-------------------------------|
| Al in Al <sub>2</sub> O <sub>3</sub> | 2.99       | As      | 2.30                          |
| Ca in CaO                            | 12.70      | B       | 44                            |
| C in CO <sub>2</sub>                 | 29.70      | Ba      | 482                           |
| Fe in Fe <sub>2</sub> O <sub>3</sub> | 2.48       | Be      | < 0.01                        |
| K in K <sub>2</sub> O                | 0.12       | Cd      | < 0.01                        |
| Mg in MgO                            | 3.00       | Co      | < 0.01                        |
| P in P <sub>2</sub> O <sub>5</sub>   | < 0.01     | Cu      | 61                            |
| Si in SiO <sub>2</sub>               | 16.50      | Hg      | 0.27                          |
| Ti in TiO <sub>2</sub>               | 30.10      | Mo      | < 0.01                        |
| Mn in MnO                            | 0.34       | Ni      | 12                            |
| S in SO <sub>3</sub>                 | 9.30       | Pb      | 0.93                          |
| Cr                                   | 0.01       | Sb      | 0.75                          |
| V                                    | 0.14       | Se      | 0.28                          |
| Cl                                   | < 0.01     | Sn      | < 0.01                        |
|                                      |            | Zn      | 60                            |

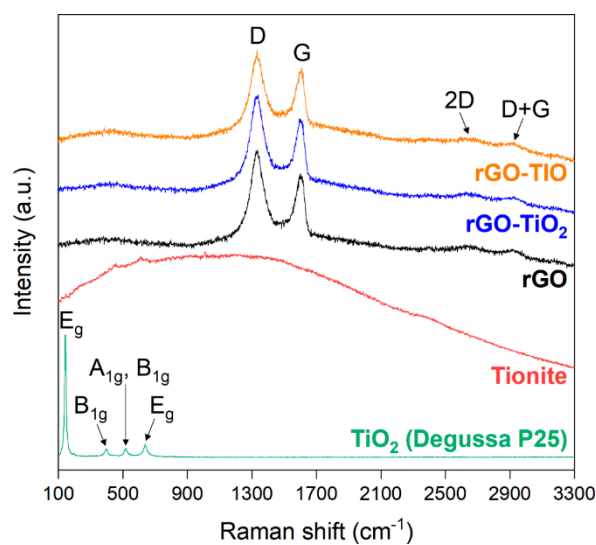**Figure S5.** Raman spectra of Degussa P25 TiO<sub>2</sub> and Tionite in powder form, as well as of rGO, rGO-TiO<sub>2</sub>, and rGO-TIO membranes.

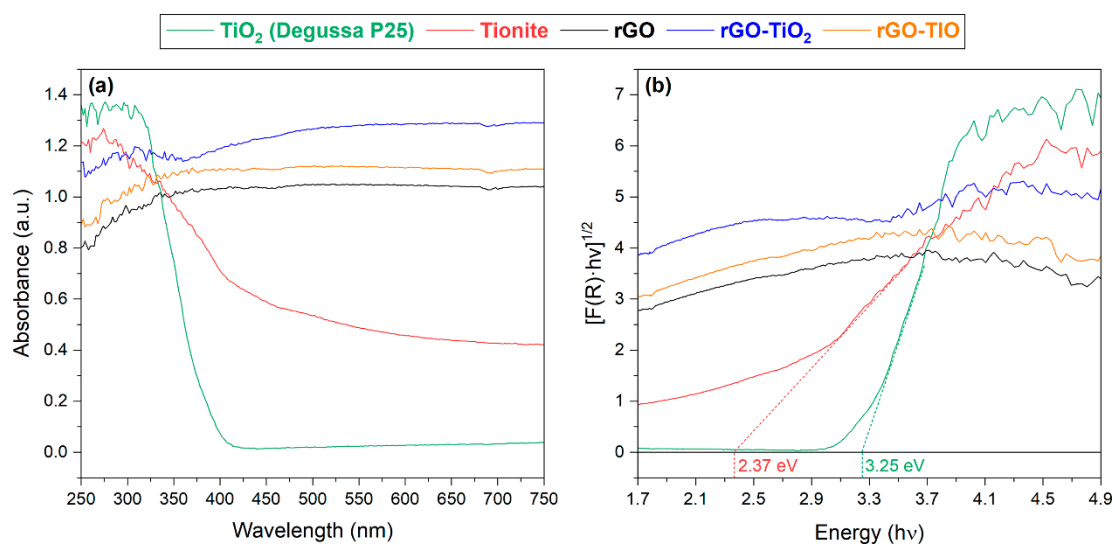

**Figure S6.** UV-Vis diffuse reflectance spectra of Degussa P25 TiO<sub>2</sub> and Tionite in powder form, as well as of rGO, rGO-TiO<sub>2</sub>, and rGO-TiO membranes: (a) absorbance versus wavelength, (b) transformed Kubelka-Munk function versus light energy.

**Table S2.** Membranes composition as measured by EDX spectroscopy.

| Membrane             |          | Elements (%wt) |       |      |       |      |      |      |      |
|----------------------|----------|----------------|-------|------|-------|------|------|------|------|
|                      |          | C              | O     | S    | Ti    | Al   | Si   | Fe   | Cu   |
| rGO                  | pristine | 61.34          | 38.14 | 0.52 | -     | -    | -    | -    | -    |
|                      | after Fe | 65.11          | 34.53 | 0.25 | -     | -    | -    | 0.11 | -    |
|                      | after Cu | 63.84          | 35.42 | 0.42 | -     | -    | -    | -    | 0.31 |
| rGO-TiO <sub>2</sub> | pristine | 29.75          | 37.43 | 0.23 | 32.60 | -    | -    | -    | -    |
|                      | after Fe | 24.66          | 39.82 | 0.26 | 33.95 | -    | -    | 1.31 | -    |
|                      | after Cu | 33.33          | 41.20 | 0.26 | 24.48 | -    | -    | -    | 0.72 |
| rGO-TiO              | pristine | 53.89          | 39.00 | 0.37 | 5.06  | 0.32 | 1.36 | -    | -    |
|                      | after Fe | 57.64          | 33.96 | 0.51 | 4.78  | 0.35 | 1.54 | 1.22 | -    |
|                      | after Cu | 56.03          | 34.68 | 0.44 | 5.96  | 0.35 | 1.37 | -    | 1.18 |

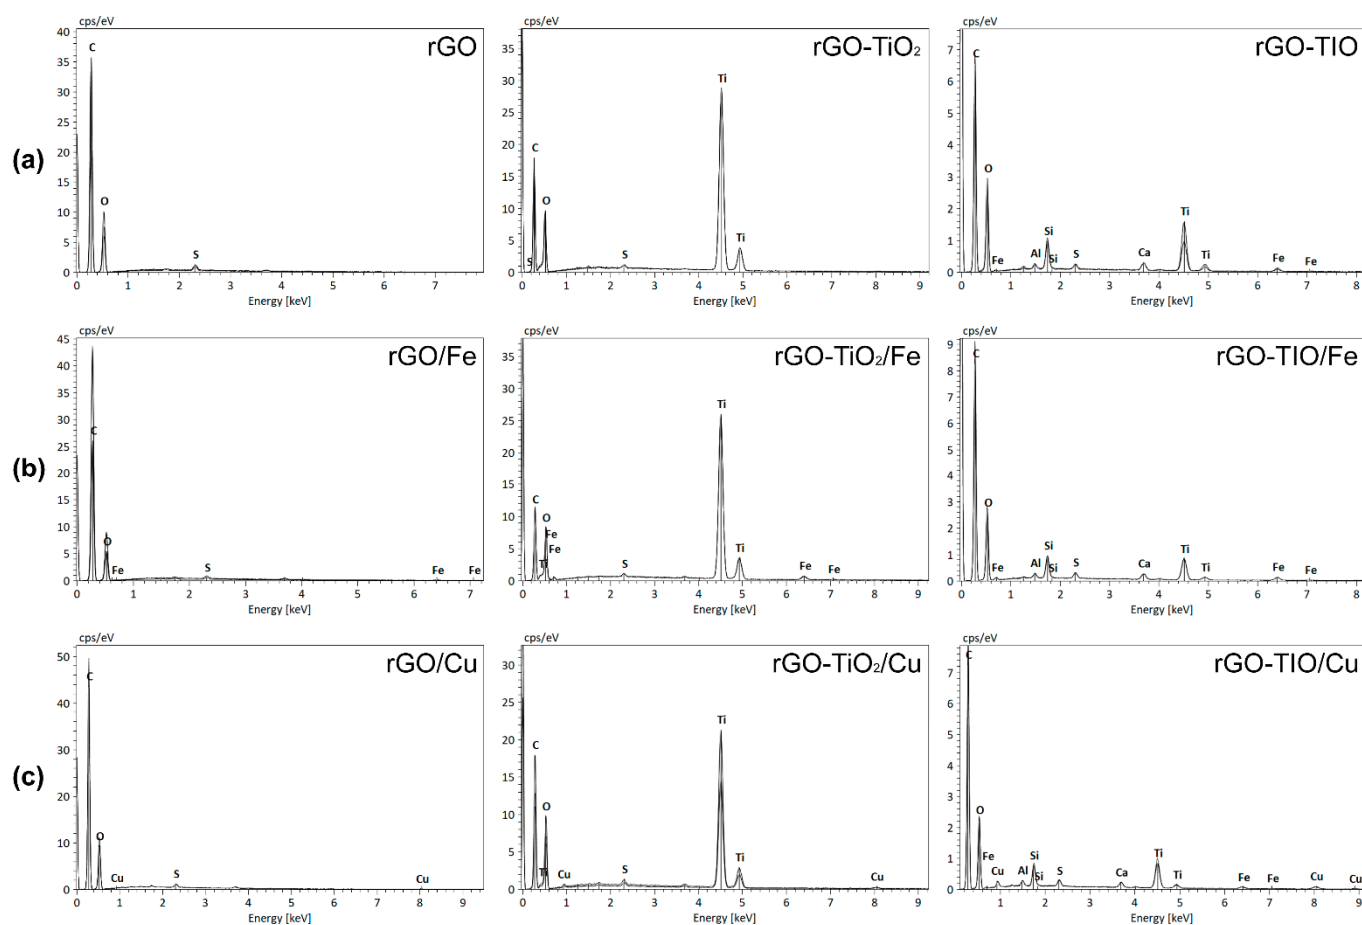

**Figure S7.** EDX spectra of rGO (left), rGO-TiO<sub>2</sub> (middle), and rGO-TiO (right) membranes: (a) pristine state, (b) after Fe capture, and (c) after Cu capture.

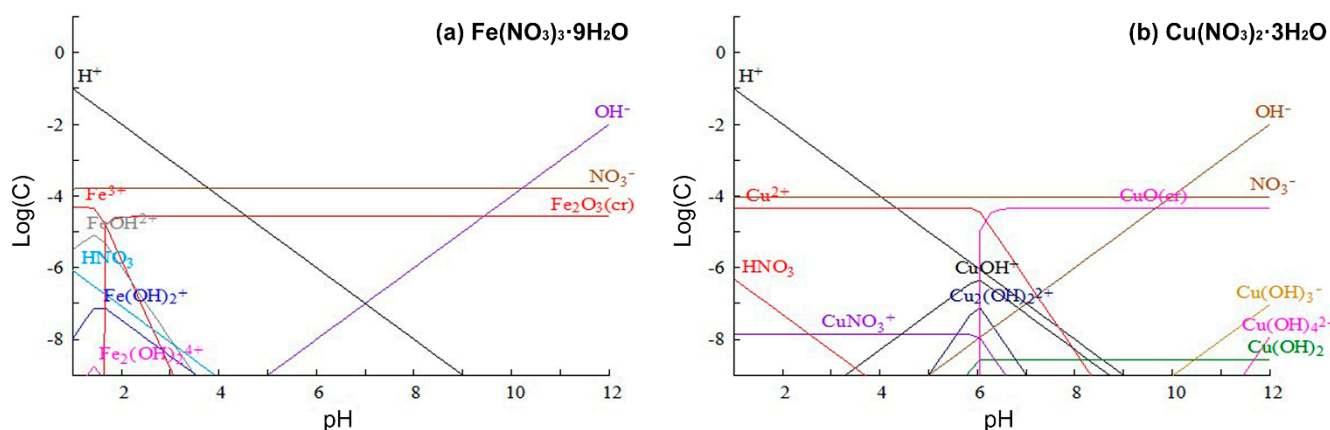

**Figure S8.** Chemical speciation in (a) iron nitrate and (b) copper nitrate solutions, computed as a function of pH by the Hydra-Medusa software.

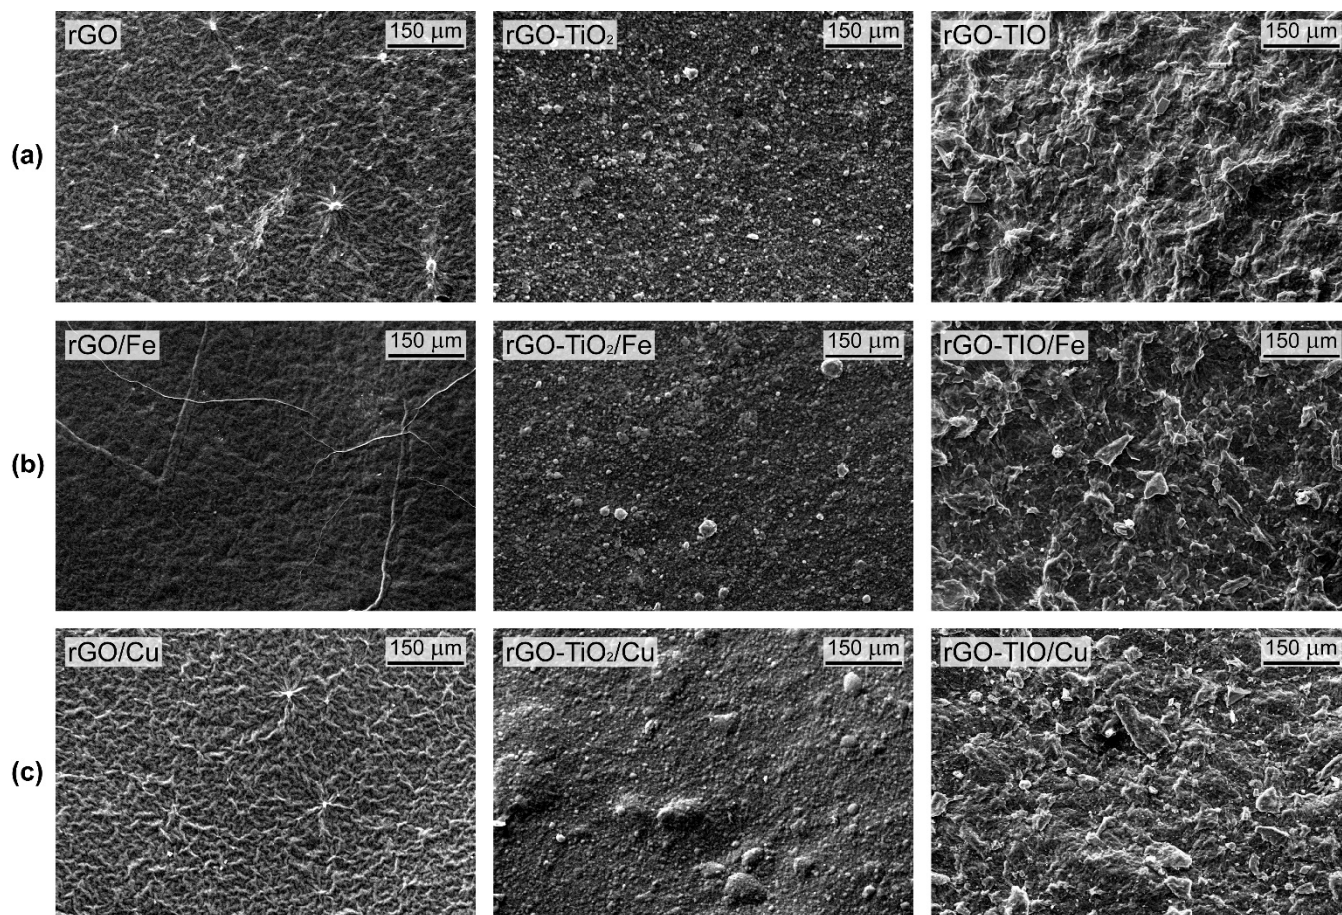

**Figure S9.** Secondary-electrons SEM pictures of rGO (left), rGO-TiO<sub>2</sub> (middle), and rGO-TiO (right) membranes: (a) pristine state, (b) after Fe capture, and (c) after Cu capture.
